# Supplementary material for: Impact of Dietary Macronutrient Intake during Early and Late Gestation on Offspring Body Composition at Birth, 1, 3, and 5 Years of Age
Source: PubMed Central journal article supplement (PMC5986459; doi:10.3390/nu10050579), 2018-05-08
Supplement: nutrients-10-00579-s001.pdf [file nutrients-10-00579-s001.pdf]

## ONLINE SUPPLEMENTAL MATERIAL

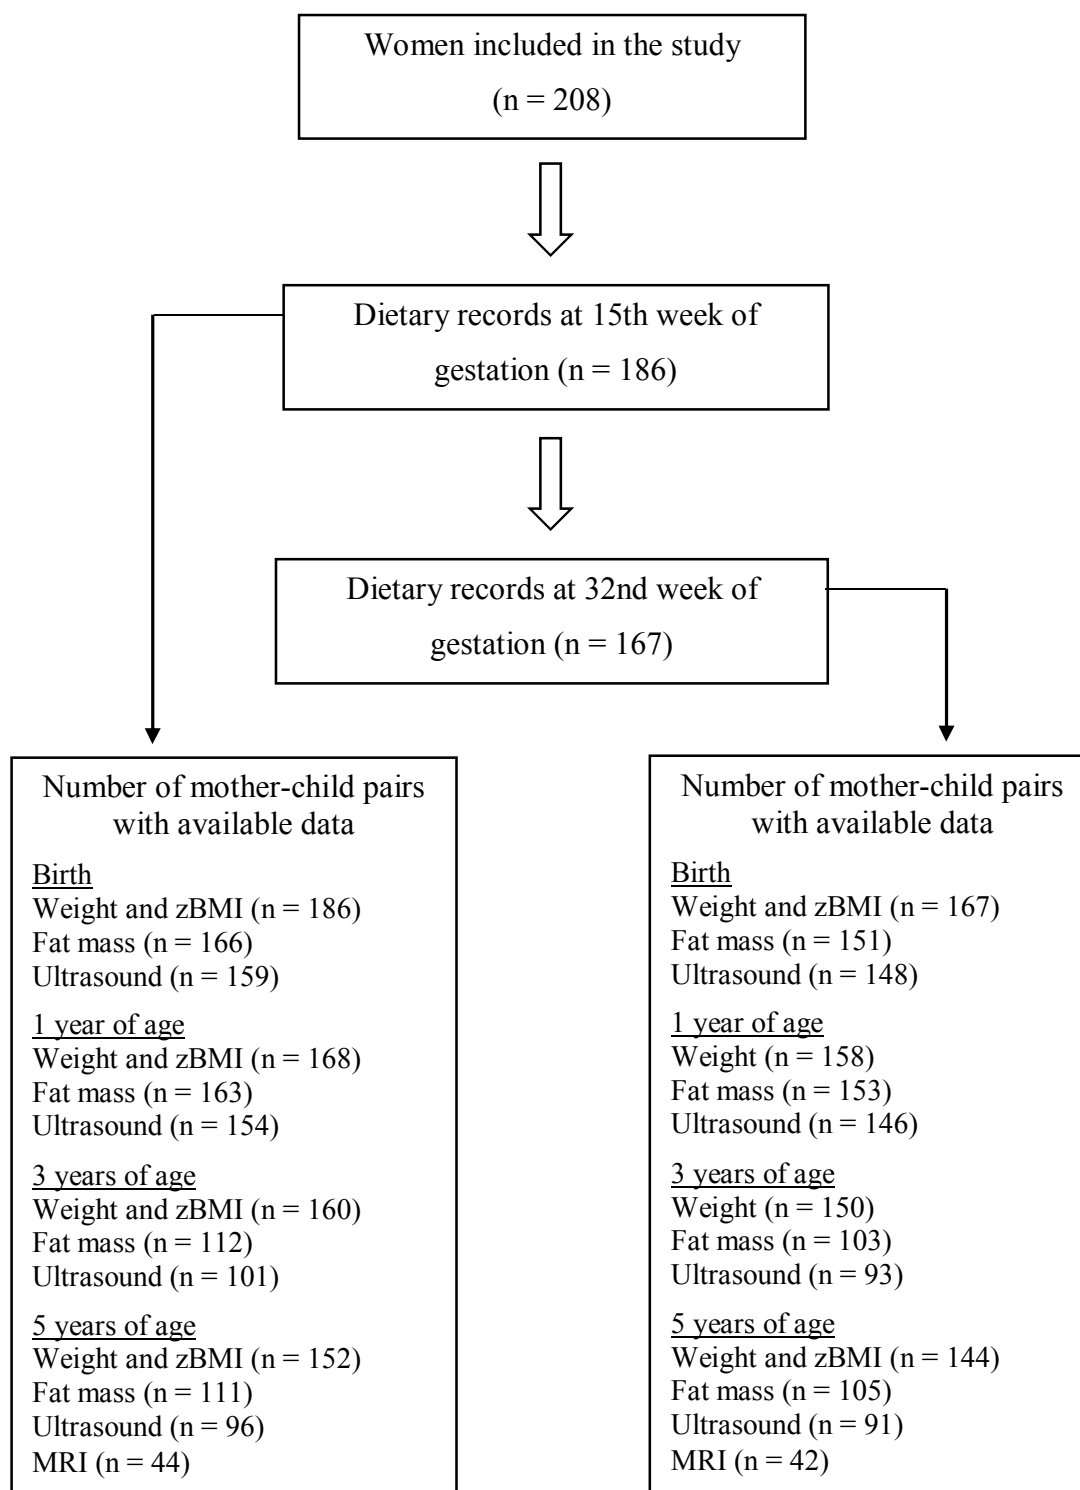

**SUPPLEMENTAL FIGURE 1** Flowchart of mother-child pairs with available data at each time point. Data for fat mass, ultrasound, and MRI were not available for all children as indicated in parentheses. For the associations between maternal diet and abdominal subcutaneous and preperitoneal fat at birth, we used ultrasound data that have been performed at 6 weeks postpartum. zBMI, BMI z score.

## ONLNE SUPPLEMENTAL MATERIAL

SUPPLEMENTAL TABLE 1 Substitution model from early gestation (15th week of gestation) at birth, 1 year, 3 years, and 5 years<sup>1</sup>

| Body Composition Parameter                                                | Macronutrients | Birth <sup>2</sup> |                        |       | 1 year |                         |       | 3 years |                          |       | 5 years |                           |       |
|---------------------------------------------------------------------------|----------------|--------------------|------------------------|-------|--------|-------------------------|-------|---------|--------------------------|-------|---------|---------------------------|-------|
|                                                                           |                | n                  | Beta (95% CI)          | p     | n      | Beta (95% CI)           | p     | n       | Beta (95% CI)            | p     | n       | Beta (95% CI)             | p     |
| Weight, g                                                                 | Fat            | 186                | 3.08 (-7.37, 13.53)    | 0.562 | 168    | 6.80 (-18.60, 32.20)    | 0.598 | 160     | -5.19 (-49.21, 38.83)    | 0.816 | 152     | -3.89 (-70.10, 62.32)     | 0.908 |
|                                                                           | SFA            | 186                | 3.23 (-16.68, 23.14)   | 0.749 | 168    | 12.43 (-35.53, 60.39)   | 0.609 | 160     | 0.91 (-81.55, 83.37)     | 0.983 | 152     | 37.80 (-87.97, 163.56)    | 0.553 |
|                                                                           | MUFA           | 186                | 10.91 (-16.14, 37.97)  | 0.427 | 168    | 21.12 (-45.17, 87.40)   | 0.530 | 160     | -9.71 (-126.25, 106.83)  | 0.869 | 152     | -1.94 (-177.78, 173.90)   | 0.983 |
|                                                                           | PUFA           | 186                | 0.64 (-29.28, 30.56)   | 0.966 | 168    | 0.05 (-71.20, 71.30)    | 0.999 | 160     | -25.90 (-151.10, 99.31)  | 0.683 | 152     | -108.39 (-294.64, 77.86)  | 0.252 |
|                                                                           | Carbohydrate   | 186                | -2.60 (-13.02, 7.82)   | 0.623 | 168    | -2.46 (-27.85, 22.92)   | 0.848 | 160     | 4.45 (-39.05, 47.94)     | 0.840 | 152     | 2.13 (-64.03, 68.29)      | 0.949 |
|                                                                           | Sugar          | 185                | -6.08 (-16.12, 3.97)   | 0.234 | 167    | -11.15 (-34.90, 12.60)  | 0.355 | 159     | -6.34 (-47.13, 34.44)    | 0.759 | 151     | -10.62 (-73.02, 51.79)    | 0.737 |
|                                                                           | Fiber          | 186                | 47.44 (-65.20, 160.10) | 0.407 | 168    | 97.64 (-181.09, 376.38) | 0.490 | 160     | 169.50 (-314.10, 653.10) | 0.490 | 152     | 26.79 (-726.10, 779.69)   | 0.944 |
|                                                                           | Protein        | 186                | 2.49 (-21.76, 26.74)   | 0.840 | 168    | -16.18 (-74.87, 42.50)  | 0.587 | 160     | 14.09 (-87.14, 115.31)   | 0.784 | 152     | 26.63 (-127.00, 180.26)   | 0.732 |
| zBMI <sup>3</sup>                                                         | Fat            | 186                | 0.01 (-0.01, 0.04)     | 0.241 | 168    | 0.01 (-0.02, 0.03)      | 0.708 | 160     | 0.04 (-0.02, 0.09)       | 0.165 | 152     | 0.00 (-0.02, 0.02)        | 0.993 |
|                                                                           | SFA            | 186                | 0.01 (-0.03, 0.05)     | 0.631 | 168    | 0.00 (-0.05, 0.05)      | 0.869 | 160     | 0.06 (-0.04, 0.17)       | 0.234 | 152     | 0.02 (-0.02, 0.06)        | 0.306 |
|                                                                           | MUFA           | 186                | 0.06 (0.00, 0.11)      | 0.053 | 168    | 0.03 (-0.04, 0.09)      | 0.463 | 160     | 0.06 (-0.09, 0.20)       | 0.458 | 152     | 0.01 (-0.05, 0.06)        | 0.773 |
|                                                                           | PUFA           | 186                | 0.01 (-0.06, 0.07)     | 0.837 | 168    | 0.00 (-0.07, 0.07)      | 0.984 | 160     | 0.08 (-0.07, 0.24)       | 0.294 | 152     | -0.04 (-0.10, 0.02)       | 0.151 |
|                                                                           | Carbohydrate   | 186                | -0.01 (-0.03, 0.01)    | 0.414 | 168    | 0.00 (-0.02, 0.03)      | 0.766 | 160     | -0.03 (-0.08, 0.03)      | 0.345 | 152     | 0.01 (-0.02, 0.03)        | 0.621 |
|                                                                           | Sugar          | 185                | -0.02 (-0.04, 0.00)    | 0.113 | 167    | -0.01 (-0.03, 0.02)     | 0.491 | 159     | -0.01 (-0.06, 0.04)      | 0.665 | 151     | 0.00 (-0.02, 0.02)        | 0.876 |
|                                                                           | Fiber          | 186                | 0.12 (-0.14, 0.35)     | 0.387 | 168    | 0.13 (-0.15, 0.42)      | 0.362 | 160     | -0.15 (-0.76, 0.47)      | 0.638 | 152     | 0.01 (-0.23, 0.25)        | 0.934 |
|                                                                           | Protein        | 186                | -0.01 (-0.06, 0.05)    | 0.843 | 168    | -0.04 (-0.10, 0.02)     | 0.227 | 160     | -0.08 (-0.21, 0.05)      | 0.205 | 152     | -0.03 (-0.08, 0.02)       | 0.310 |
| Fat mass, g                                                               | Fat            | 166                | 0.46 (-3.07, 3.99)     | 0.798 | 163    | 0.13 (-11.04, 11.31)    | 0.981 | 112     | 3.39 (-15.74, 22.52)     | 0.726 | 111     | 16.40 (-14.53, 47.33)     | 0.295 |
|                                                                           | SFA            | 166                | 1.28 (-5.58, 8.14)     | 0.713 | 163    | 2.68 (-18.37, 23.73)    | 0.802 | 112     | 17.07 (-18.59, 52.73)    | 0.345 | 111     | 40.90 (-16.67, 98.48)     | 0.162 |
|                                                                           | MUFA           | 166                | 1.31 (-7.85, 10.47)    | 0.163 | 163    | 9.60 (-19.50, 38.70)    | 0.516 | 112     | 3.81 (-45.36, 52.98)     | 0.878 | 111     | 21.17 (-59.08, 101.41)    | 0.602 |
|                                                                           | PUFA           | 166                | -2.22 (-12.25, 7.80)   | 0.662 | 163    | -13.22 (-44.24, 17.79)  | 0.401 | 112     | -17.08 (-72.50, 38.34)   | 0.543 | 111     | 3.48 (-86.95, 93.90)      | 0.939 |
|                                                                           | Carbohydrate   | 166                | -0.38 (-3.91, 3.16)    | 0.834 | 163    | 2.05 (-9.18, 13.28)     | 0.719 | 112     | 2.58 (-16.80, 21.97)     | 0.792 | 111     | -13.92 (-45.69, 17.85)    | 0.387 |
|                                                                           | Sugar          | 166                | -1.82 (-5.27, 1.64)    | 0.301 | 162    | 1.03 (-9.35, 11.40)     | 0.845 | 111     | 0.50 (-16.24, 17.24)     | 0.953 | 110     | -11.72 (-38.85, 15.41)    | 0.394 |
|                                                                           | Fiber          | 166                | 21.51 (-18.53, 61.55)  | 0.290 | 163    | 33.91 (-92.46, 160.29)  | 0.597 | 112     | -33.83 (-248.70, 181.05) | 0.756 | 111     | -142.31 (-495.91, 211.29) | 0.427 |
|                                                                           | Protein        | 166                | 1.10 (-7.16, 9.37)     | 0.792 | 163    | -8.68 (-34.42, 17.06)   | 0.506 | 112     | -25.51 (-70.98, 19.96)   | 0.268 | 111     | 0.52 (-73.68, 74.73)      | 0.989 |
| Subcutaneous fat area <sub>sagittal</sub> <sup>4</sup> , mm <sup>2</sup>  | Fat            | 159                | -0.11 (-0.42, 0.21)    | 0.511 | 154    | -0.28 (-0.63, 0.07)     | 0.116 | 101     | -0.08 (-0.47, 0.30)      | 0.671 | 96      | -0.09 (-0.51, 0.32)       | 0.658 |
|                                                                           | SFA            | 159                | -0.04 (-0.65, 0.57)    | 0.895 | 154    | -0.46 (-1.14, 0.21)     | 0.177 | 101     | 0.07 (-0.65, 0.80)       | 0.843 | 96      | 0.06 (-0.73, 0.85)        | 0.883 |
|                                                                           | MUFA           | 159                | 0.08 (-0.74, 0.83)     | 0.849 | 154    | -0.29 (-1.22, 0.63)     | 0.534 | 101     | -0.37 (-1.39, 0.65)      | 0.476 | 96      | -0.18 (-1.27, 0.92)       | 0.751 |
|                                                                           | PUFA           | 159                | -0.695 (-1.56, 0.17)   | 0.144 | 154    | -0.68 (-1.67, 0.30)     | 0.173 | 101     | -0.38 (-1.50, 0.74)      | 0.501 | 96      | -0.68 (-1.91, 0.55)       | 0.275 |
|                                                                           | Carbohydrate   | 159                | 0.08 (-0.23, 0.40)     | 0.598 | 154    | 0.40 (0.05, 0.75)       | 0.025 | 101     | 0.22 (-0.18, 0.61)       | 0.277 | 96      | 0.18 (-0.25, 0.60)        | 0.413 |
|                                                                           | Sugar          | 159                | 0.20 (-0.09, 0.50)     | 0.174 | 153    | 0.26 (0.07, 0.58)       | 0.116 | 100     | 0.29 (-0.03, 0.61)       | 0.073 | 95      | 0.26 (-0.09, 0.60)        | 0.143 |
|                                                                           | Fiber          | 159                | 1.05 (-2.54, 4.64)     | 0.564 | 154    | 0.28 (-3.72, 4.27)      | 0.891 | 101     | -1.19 (-5.58, 3.19)      | 0.590 | 96      | -2.89 (-7.60, 1.83)       | 0.227 |
|                                                                           | Protein        | 159                | 0.11 (-0.61, 0.82)     | 0.768 | 154    | -0.59 (-1.43, 0.26)     | 0.171 | 101     | -0.52 (-1.37, 0.34)      | 0.232 | 96      | -0.37 (-1.36, 0.62)       | 0.459 |
| Preperitoneal fat area <sub>sagittal</sub> <sup>4</sup> , mm <sup>2</sup> | Fat            | 151                | -0.02 (-0.12, 0.08)    | 0.722 | 153    | -0.06 (-0.21, 0.10)     | 0.460 | 100     | -0.11 (-0.50, 0.27)      | 0.559 | 95      | -0.44 (-0.92, 0.03)       | 0.064 |
|                                                                           | SFA            | 151                | -0.02 (-0.20, 0.16)    | 0.831 | 153    | -0.12 (-0.42, 0.18)     | 0.422 | 100     | -0.06 (-0.78, 0.67)      | 0.875 | 95      | -0.49 (-1.40, 0.42)       | 0.284 |
|                                                                           | MUFA           | 151                | 0.05 (-0.20, 0.30)     | 0.671 | 113    | -0.01 (-0.42, 0.40)     | 0.958 | 100     | -0.24 (-1.26, 0.78)      | 0.638 | 95      | -1.04 (-2.30, 0.21)       | 0.103 |
|                                                                           | PUFA           | 151                | -0.14 (-0.40, 0.13)    | 0.305 | 153    | -0.19 (-0.63, 0.25)     | 0.390 | 100     | -0.46 (-1.58, 0.65)      | 0.409 | 95      | -1.12 (-2.52, 0.28)       | 0.115 |
|                                                                           | Carbohydrate   | 151                | 0.00 (-0.10, 0.10)     | 0.971 | 153    | 0.06 (-0.10, 0.22)      | 0.479 | 100     | 0.15 (-0.25, 0.54)       | 0.462 | 95      | 0.48 (-0.01, 0.954)       | 0.053 |
|                                                                           | Sugar          | 151                | -0.03 (-0.12, 0.06)    | 0.559 | 152    | -0.04 (-0.18, 0.11)     | 0.621 | 99      | -0.04 (-0.37, 0.29)      | 0.822 | 94      | -0.07 (-0.48, 0.34)       | 0.731 |
|                                                                           | Fiber          | 151                | 0.20 (-0.89, 1.29)     | 0.716 | 153    | -0.35 (-2.13, 1.44)     | 0.702 | 100     | -0.81 (-5.18, 3.56)      | 0.714 | 95      | 1.67 (-3.77, 7.10)        | 0.543 |
|                                                                           | Protein        | 151                | 0.11 (-0.11, 0.33)     | 0.333 | 153    | 0.06 (-0.32, 0.43)      | 0.760 | 100     | -0.05 (-0.91, 0.81)      | 0.910 | 95      | -0.02 (-1.16, 1.13)       | 0.979 |

<sup>1</sup> Beta (95% confidence interval (CI)) illustrates the estimated unit change in the respective body composition parameter, associated with an increase of 1% of energy of the macronutrient of interest in the substitution of other macronutrients (isocaloric); regressions were adjusted for sex (except zBMI), pre-pregnancy BMI, gestational age in days, and group allocation; zBMI, BMI z score.<sup>2</sup> Ultrasound measurements were performed at 6 wk postpartum.<sup>3</sup> zBMI according to (1).<sup>4</sup> Subcutaneous and preperitoneal fat were measured as areas of 1-cm length in sagittal plane in the middle of the xiphoid process according to Brei et al. (2).

## ONLINE SUPPLEMENTAL MATERIAL

**SUPPLEMENTAL TABLE 2** Substitution model from early (15th week of gestation) and late gestation (32nd week of gestation) on offspring abdominal subcutaneous and visceral adipose tissue volume at 5 years<sup>1</sup>

| Body Composition Parameter  | Macronutrients | Early gestation |                         |       | Late gestation |                        |       |
|-----------------------------|----------------|-----------------|-------------------------|-------|----------------|------------------------|-------|
|                             |                | n               | Beta (95% CI)           | p     | n              | Beta (95% CI)          | p     |
| SAT volume, cm <sup>3</sup> | Fat            | 44              | 3.35 (-3.80, 10.49)     | 0.348 | 42             | -3.45 (12.95, 6.05)    | 0.465 |
|                             | SFA            | 44              | 8.20 (-4.40, 20.79)     | 0.195 | 42             | -2.86 (-18.70, 12.97)  | 0.716 |
|                             | MUFA           | 44              | 1.07 (-19.14, 21.29)    | 0.915 | 42             | 6.37 (-20.14, 32.88)   | 0.629 |
|                             | PUFA           | 44              | 1.52 (-19.04, 22.08)    | 0.882 | 42             | -24.16 (-51.33, 3.01)  | 0.080 |
|                             | Carbohydrate   | 44              | -2.15 (-10.43, 6.14)    | 0.603 | 42             | 4.05 (-4.91, 13.02)    | 0.365 |
|                             | Sugar          | 43              | -1.93 (-9.31, 5.44)     | 0.598 | 42             | 7.81 (-0.95, 16.58)    | 0.079 |
|                             | Fiber          | 44              | -43.64 (-133.44, 46.17) | 0.331 | 42             | 36.27 (-37.30, 109.85) | 0.324 |
|                             | Protein        | 44              | -9.85 (-27.42, 7.72)    | 0.263 | 42             | -2.92 (-24.81, 18.97)  | 0.788 |
| VAT volume, cm <sup>3</sup> | Fat            | 44              | -0.29 (-1.88, 1.30)     | 0.711 | 42             | 0.03 (-2.10, 2.15)     | 0.979 |
|                             | SFA            | 44              | 0.39 (-2.45, 3.22)      | 0.783 | 42             | 0.35 (-3.17, 3.87)     | 0.841 |
|                             | MUFA           | 44              | -2.03 (-6.43, 2.37)     | 0.357 | 42             | 2.44 (-3.41, 8.28)     | 0.403 |
|                             | PUFA           | 44              | -1.48 (-5.99, 3.02)     | 0.510 | 42             | -2.80 (-9.02, 3.43)    | 0.368 |
|                             | Carbohydrate   | 44              | 0.72 (-1.10, 2.53)      | 0.430 | 42             | 0.10 (-1.92, 2.11)     | 0.924 |
|                             | Sugar          | 43              | 0.42 (-1.26, 2.10)      | 0.617 | 42             | 0.68 (-1.34, 2.70)     | 0.496 |
|                             | Fiber          | 44              | -19.93 (-38.84, -1.02)  | 0.039 | 42             | 2.18 (-14.36, 18.71)   | 0.791 |
|                             | Protein        | 44              | -2.19 (-6.06, 1.68)     | 0.258 | 42             | -0.11 (-4.98, 4.75)    | 0.962 |

<sup>1</sup>Beta (95% confidence interval (CI)) illustrates the estimated unit change in the respective body composition parameter, associated with an increase of 1% of energy of the macronutrient of interest in the substitution of other macronutrients (isocaloric); regressions were adjusted for sex (except zBMI), pre-pregnancy BMI, gestational age in days, and group allocation. SAT, subcutaneous adipose tissue; VAT, visceral adipose tissue; zBMI, BMI z score.

## ONLINE SUPPLEMENTAL MATERIAL

SUPPLEMENTAL TABLE 3 Substitution model from late gestation (32nd week of gestation) at birth, 1 year, 3 years, and 5 years<sup>1</sup>

| Body Composition Parameter                                                | Macronutrients | Birth <sup>2</sup>  |                        |       | 1 year             |                         |       | 3 years             |                         |       | 5 years            |                           |       |
|---------------------------------------------------------------------------|----------------|---------------------|------------------------|-------|--------------------|-------------------------|-------|---------------------|-------------------------|-------|--------------------|---------------------------|-------|
|                                                                           |                | n                   | Beta (95% CI)          | p     | n                  | Beta (95% CI)           | p     | n                   | Beta (95% CI)           | p     | n                  | Beta (95% CI)             | p     |
| Weight, g                                                                 | Fat            | 167                 | -4.08 (-15.43, 7.27)   | 0.479 | 158                | -0.70 (-27.83, 26.43)   | 0.959 | 150                 | 10.07 (-37.50, 57.65)   | 0.676 | 144                | 13.91 (-56.28, 84.09)     | 0.696 |
|                                                                           | SFA            | 167                 | 1.08 (-17.69, 19.86)   | 0.910 | 158                | -19.94 (-64.33, 24.45)  | 0.376 | 150                 | -17.84 (96.48, 60.80)   | 0.655 | 144                | -15.42 (-133.27, 102.42)  | 0.796 |
|                                                                           | MUFA           | 167                 | -7.28 (-38.35, 23.79)  | 0.644 | 158                | 34.98 (-39.24, 109.20)  | 0.353 | 150                 | 50.65 (-79.47, 180.77)  | 0.443 | 144                | 76.89 (-115.51, 269.31)   | 0.431 |
|                                                                           | PUFA           | 167                 | -25.40 (-58.77, 7.97)  | 0.135 | 158                | 25.57 (-55.02, 106.15)  | 0.532 | 150                 | 77.31 (-61.74, 216.35)  | 0.274 | 144                | 80.67 (-128.55, 289.90)   | 0.447 |
|                                                                           | Carbohydrate   | 167                 | 7.24 (-3.33, 17.81)    | 0.178 | 158                | 5.94 (-19.36, 31.24)    | 0.643 | 150                 | -0.21 (-44.57, 44.15)   | 0.993 | 144                | 0.34 (-64.67, 65.35)      | 0.992 |
|                                                                           | Sugar          | 167                 | 9.99 (-0.47, 20.44)    | 0.061 | 158                | 4.60 (-20.46, 29.67)    | 0.717 | 150                 | 12.73 (-31.21, 56.67)   | 0.568 | 144                | 5.01 (-58.97, 68.99)      | 0.877 |
|                                                                           | Fiber          | 167                 | 57.66 (-49.82, 165.13) | 0.291 | 158                | 175.01 (-85.26, 435.27) | 0.186 | 150                 | 420.72 (-29.41, 870.84) | 0.067 | 144                | 589.93 (-104.18, 1284.04) | 0.095 |
| zBMI <sup>3</sup>                                                         | Protein        | 167                 | -18.00 (-44.59, 8.59)  | 0.183 | 158                | -26.30 (-90.00, 37.38)  | 0.416 | 150                 | -46.34 (-158.71, 66.04) | 0.416 | 144                | -64.47 (-232.53, 103.59)  | 0.449 |
|                                                                           | Fat            | 167                 | 0.00 (-0.02, 0.03)     | 0.862 | 158                | -0.02 (-0.05, 0.01)     | 0.179 | 150                 | -0.05 (-0.11, 0.01)     | 0.082 | 144                | -0.00 (-0.02, 0.02)       | 0.865 |
|                                                                           | SFA            | 167                 | 0.01 (-0.03, 0.05)     | 0.524 | 158                | -0.04 (-0.09, 0.00)     | 0.054 | 150                 | -0.08 (-0.17, 0.02)     | 0.127 | 144                | -0.01 (-0.05, 0.03)       | 0.490 |
|                                                                           | MUFA           | 167                 | 0.00 (-0.06, 0.07)     | 0.965 | 158                | -0.01 (-0.09, 0.06)     | 0.752 | 150                 | -0.09 (-0.25, 0.07)     | 0.259 | 144                | 0.02 (-0.05, 0.08)        | 0.585 |
|                                                                           | PUFA           | 167                 | -0.03 (-0.10, 0.04)    | 0.405 | 158                | 0.00 (-0.08, 0.08)      | 0.915 | 150                 | -0.07 (-0.25, 0.10)     | 0.404 | 144                | 0.01 (-0.06, 0.08)        | 0.734 |
|                                                                           | Carbohydrate   | 167                 | 0.01 (-0.02, 0.03)     | 0.551 | 158                | 0.02 (-0.00, 0.05)      | 0.060 | 150                 | 0.06 (0.01, 0.12)       | 0.023 | 144                | 0.01 (-0.01, 0.03)        | 0.352 |
|                                                                           | Sugar          | 167                 | 0.01 (-0.01, 0.04)     | 0.251 | 158                | 0.02 (-0.01, 0.04)      | 0.121 | 150                 | 0.07 (0.01, 0.12)       | 0.015 | 144                | 0.01 (-0.01, 0.03)        | 0.502 |
| Fat mass, g                                                               | Fiber          | 167                 | 0.07 (-0.15, 0.30)     | 0.522 | 158                | 0.19 (-0.07, 0.44)      | 0.155 | 150                 | 0.34 (-0.22, 0.91)      | 0.235 | 144                | 0.27 (0.05, 0.49)         | 0.019 |
|                                                                           | Protein        | 167                 | -0.04 (-0.10, 0.01)    | 0.136 | 158                | -0.05 (-0.11, 0.02)     | 0.154 | 150                 | -0.15 (-0.29, -0.01)    | 0.037 | 144                | -0.06 (-0.11, -0.00)      | 0.037 |
|                                                                           | Fat            | 151                 | -1.70 (-5.64, 2.24)    | 0.396 | 153                | -3.01 (-14.59, 8.56)    | 0.608 | 103                 | -2.57 (-23.28, 18.13)   | 0.806 | 105                | -7.32 (-39.84, 25.20)     | 0.656 |
|                                                                           | SFA            | 151                 | 0.38 (-6.02, 6.78)     | 0.906 | 153                | -9.64 (-28.54, 9.27)    | 0.315 | 103                 | -16.63 (-50.34, 17.09)  | 0.330 | 105                | -28.04 (-81.38, 25.31)    | 0.300 |
|                                                                           | MUFA           | 151                 | -4.55 (-15.31, 6.21)   | 0.405 | 153                | 11.47 (-20.47, 43.41)   | 0.479 | 103                 | 9.66 (-46.47, 65.78)    | 0.733 | 105                | 8.06 (-80.19, 96.31)      | 0.857 |
|                                                                           | PUFA           | 151                 | -9.20 (-20.94, 2.54)   | 0.124 | 153                | -4.62 (-39.35, 30.11)   | 0.793 | 103                 | 24.05 (-34.61, 82.70)   | 0.418 | 105                | 24.52 (-65.42, 114.46)    | 0.590 |
|                                                                           | Carbohydrate   | 151                 | 1.65 (-1.98, 5.28)     | 0.370 | 153                | 4.09 (-6.72, 14.89)     | 0.456 | 103                 | 5.87 (-12.63, 24.36)    | 0.530 | 105                | 12.42 (-17.07, 41.91)     | 0.405 |
| Subcutaneous fat area <sub>sagittal</sub> <sup>4</sup> , mm <sup>2</sup>  | Sugar          | 151                 | 1.32 (-2.37, 5.01)     | 0.481 | 153                | 3.26 (-7.48, 13.99)     | 0.550 | 103                 | 6.52 (-10.97, 24.01)    | 0.461 | 105                | 12.20 (-15.31, 39.70)     | 0.381 |
|                                                                           | Fiber          | 151                 | 20.12 (-18.84, 59.07)  | 0.309 | 153                | 93.09 (-20.39, 206.57)  | 0.107 | 103                 | 202.45 (19.28, 385.63)  | 0.031 | 105                | 295.60 (4.52, 586.69)     | 0.047 |
|                                                                           | Protein        | 151                 | 0.53 (-8.44, 9.50)     | 0.907 | 153                | -5.43 (-32.86, 22.00)   | 0.696 | 103                 | -22.37 (-72.26, 27.53)  | 0.376 | 105                | -45.16 (-123.00, 32.69)   | 0.252 |
|                                                                           | Fat            | 148                 | -0.30 (-0.64, 0.05)    | 0.089 | 146                | -0.44 (-0.80, -0.07)    | 0.020 | 93                  | -0.33 (-0.76, 0.10)     | 0.131 | 91                 | -0.35 (-0.81, 0.11)       | 0.130 |
|                                                                           | SFA            | 148                 | -0.49 (-1.05, 0.08)    | 0.090 | 146                | -0.74 (-1.34, -0.14)    | 0.016 | 93                  | -0.48 (-1.21, 0.25)     | 0.191 | 91                 | -0.34 (-1.12, 0.44)       | 0.390 |
|                                                                           | MUFA           | 148                 | -0.32 (-1.24, 0.61)    | 0.499 | 146                | -0.52 (-1.54, 0.50)     | 0.314 | 93                  | -0.09 (-1.25, 1.07)     | 0.884 | 91                 | -0.37 (-1.57, 0.82)       | 0.534 |
|                                                                           | PUFA           | 148                 | -0.38 (-1.38, 0.61)    | 0.446 | 146                | -0.37 (-1.49, 0.74)     | 0.508 | 93                  | -0.84 (-2.01, 0.34)     | 0.161 | 91                 | -1.05 (-2.31, 0.21)       | 0.100 |
| Preperitoneal fat area <sub>sagittal</sub> <sup>4</sup> , mm <sup>2</sup> | Carbohydrate   | 148                 | 0.24 (-0.08, 0.56)     | 0.143 | 146                | 0.45 (0.11, 0.79)       | 0.010 | 93                  | 0.31 (-0.07, 0.70)      | 0.106 | 91                 | 0.36 (-0.04, 0.77)        | 0.078 |
|                                                                           | Sugar          | 148                 | 0.16 (-0.16, 0.47)     | 0.338 | 146                | 0.20 (-0.14, 0.54)      | 0.248 | 93                  | 0.38 (0.03, 0.72)       | 0.032 | 91                 | 0.41 (0.04, 0.77)         | 0.031 |
|                                                                           | Fiber          | 148                 | 1.91 (-1.39, 5.21)     | 0.255 | 146                | 4.22 (0.64, 7.80)       | 0.021 | 93                  | 3.07 (-0.74, 6.89)      | 0.113 | 91                 | 1.75 (-2.32, 5.82)        | 0.395 |
|                                                                           | Protein        | 148                 | 0.03 (-0.76, 0.81)     | 0.948 | 146                | -0.40 (-1.32, 0.52)     | 0.396 | 93                  | -0.18 (-1.12, 0.74)     | 0.694 | 91                 | -0.70 (-1.75, 0.35)       | 0.191 |
|                                                                           | Fat            | 141                 | 0.01 (-0.10, 0.11)     | 0.920 | 145                | 0.00 (-0.17, 0.17)      | 0.990 | 92                  | 0.05 (-0.38, 0.49)      | 0.813 | 90                 | -0.23 (-0.77, 0.30)       | 0.385 |
|                                                                           | SFA            | 141                 | 0.01 (-0.16, 0.19)     | 0.874 | 145                | -0.19 (-0.46, 0.09)     | 0.185 | 92                  | 0.12 (-0.62, 0.85)      | 0.754 | 90                 | -0.43 (-1.33, 0.48)       | 0.349 |
|                                                                           | MUFA           | 141                 | 0.04 (-0.25, 0.32)     | 0.804 | 145                | 0.23 (-0.23, 0.69)      | 0.325 | 92                  | 0.10 (-1.06, 1.26)      | 0.861 | 90                 | -0.60 (-1.98, 0.79)       | 0.393 |
| PUFA                                                                      | 141            | -0.06 (-0.37, 0.25) | 0.697                  | 145   | 0.35 (-0.16, 0.85) | 0.175                   | 92    | -0.10 (-1.28, 1.07) | 0.861                   | 90    | 0.05 (-1.42, 1.53) | 0.944                     |       |
| Preperitoneal fat area <sub>sagittal</sub> <sup>4</sup> , mm <sup>2</sup> | Carbohydrate   | 141                 | -0.03 (-0.13, 0.07)    | 0.610 | 145                | -0.04 (-0.19, 0.12)     | 0.667 | 92                  | -0.01 (-0.40, 0.38)     | 0.946 | 90                 | 0.19 (-0.29, 0.67)        | 0.427 |
|                                                                           | Sugar          | 141                 | -0.02 (-0.12, 0.08)    | 0.694 | 145                | 0.00 (-0.15, 0.16)      | 0.988 | 92                  | 0.19 (-0.16, 0.54)      | 0.286 | 90                 | 0.34 (0.09, 0.77)         | 0.122 |
|                                                                           | Fiber          | 141                 | 0.211 (-0.81, 1.23)    | 0.682 | 145                | 0.28 (-1.37, 1.93)      | 0.736 | 92                  | -0.461 (-4.33, 3.41)    | 0.814 | 90                 | 1.21 (-3.51, 5.94)        | 0.611 |
|                                                                           | Protein        | 141                 | 0.05 (-0.18, 0.29)     | 0.650 | 145                | 0.19 (-0.22, 0.61)      | 0.362 | 92                  | -0.22 (-1.15, 0.70)     | 0.635 | 90                 | -0.37 (-1.61, 0.87)       | 0.553 |

<sup>1</sup>Beta (95% confidence interval (CI)) illustrates the estimated unit change in the respective body composition parameter, associated with an increase of 1% of energy of the macronutrient of interest in the substitution of other macronutrients (isocaloric); regressions were adjusted for sex (except zBMI), pre-pregnancy BMI, gestational age in days, and group allocation; z BMI, BMI z score.<sup>2</sup> Ultrasound measurements were performed at 6 wk postpartum.<sup>3</sup> zBMI according to (1). <sup>4</sup> Subcutaneous and preperitoneal fat were measured as areas of 1-cm length in sagittal plane in the middle of the xiphoid process according to Brei et al. (2).

## ONLINE SUPPLEMENTAL MATERIAL

**REFERENCES**

1. Kromeyer-Hauschild K, Wabitsch M, Kunze D, Geller F, Geiß HC, Hesse V, Hippel von A, Jaeger U, Johnsen D, Korte W, et al. Percentiles of body mass index in children and adolescents evaluated from different regional German studies. *Monatsschrift Kinderheilkunde* 2001;8(149):807–19.
2. Brei C, Much D, Heimberg E, Schulte V, Brunner S, Stecher L, Vollhardt C, Bauer JS, Amann-Gassner U, Hauner H. Sonographic assessment of abdominal fat distribution during the first year of infancy. *Pediatr Res* 2015;78(3):342–50. doi: 10.1038/pr.2015.108.
